# Supplementary material
Source: Elsevier journal article supplement (https://www.sciencedirect.com/science/article/pii/S0021755723000086)
Supplement: mmc1 [file S0021755723000086:mmc1.docx]

**JPED-D-22-00245 – Supplementary Material**

**Supplementary table:** Medications used according to the first and second evaluations and according to the diseases

|  | **N = 50 patients** |
| --- | --- |
| **Medications used by JSLE patients -** **1st evaluation, n (%)** |  |
| antimalarials | 19 (13.4) |
| immunosupressives | 12 (8,5) |
| corticosteroids | 20 (14.1) |
| diuretics | 12 (8.4) |
| antihypertensives | 19 (13.3) |
| gastric protector | 14 (9.9) |
| vitamin D | 12 (8.5) |
| calcium + vitamin D | 15 (10.6) |
| conventional DMARDs | 4 (2.8) |
| folic acid | 4 (2.8) |
| NSAIDs | 3 (2.1) |
| anti-emetics | 5 (3.5) |
| antidepressants | 3 (2.1) |
|  |  |
| **Medications used by JSLE patients -** **2nd evaluation, n (%)** |  |
| antimalarials | 20 (13.4) |
| immunosupressives | 14 (9.4) |
| corticosteroids | 18 (12.1) |
| diuretics | 13 (8.7) |
| antihypertensives | 19 (12.7) |
| gastric protector | 18 (12.1) |
| vitamin D | 16 (10.7) |
| calcium + vitamin D | 14 (9.4) |
| conventional DMARDs | 3 (2.0) |
| folic acid | 3 (2.0) |
| NSAIDs | 4 (2.7) |
| anti-emetics | 4 (2.7) |
| antidepressants | 3 (2.1) |
|  |  |
| **Medications used by JIA patients -** **1st evaluation, n (%)** |  |
| conventional DMARDs | 21 (30.9) |
| folic acid | 21 (30.9) |
| corticosteroids | 7 (10.3) |
| NSAIDs | 4 (5.9) |
| gastric protector | 5 (7.3) |
| anti-emetics | 3 (4.4) |
| vitamin D | 4 (5.9) |
| calcium + vitamin D | 1 (1.5) |
| ferrous sulphate | 2 (2.9) |
|  |  |
| **Medications used by JIA patients -** **2nd evaluation, n (%)** |  |
| conventional DMARDs | 19 (30.6) |
| folic acid | 19 (30.6) |
| corticosteroids | 4 (6.5) |
| NSAIDs | 5 (8.1) |
| gastric protector | 4 (6.5) |
| anti-emetics | 3 (4.8) |
| vitamin D | 4 (6.5) |
| calcium + vitamin D | 2 (3.2) |
| ferrous sulphate | 1 (1.6) |
| monoclonal antibody | 1 (1.6) |
|  |  |
| **Medications used by JDM patients -** **1st evaluation, n (%)** |  |
| conventional DMARDs | 5 (26.3) |
| folic acid | 5 (26.3) |
| corticosteroids | 3 (15.9) |
| vitamin D | 2 (10.5) |
| gastric protector | 2 (10.5) |
| anti-emetics | 2 (10.5) |
|  |  |
| **Medications used by JDM patients -** **2nd evaluation, n (%)** |  |
| conventional DMARDs | 5 (20.0) |
| folic acid | 5 (20.0) |
| corticosteroids | 2 (8.0) |
| immunosupressives | 1 (4.0) |
| vitamin D | 5 (20.0) |
| gastric protector | 3 (12.0) |
| anti-emetics | 4 (16.0) |
|  |  |
| **Medications used by JSSc patients -** **1st evaluation, n (%)** |  |
| conventional DMARD | 1 (33.3) |
| folic acid | 1 (33.3) |
| antihypertensive | 1 (33.3) |
|  |  |
| **Medications used by JSSc patients -** **2nd evaluation, n (%)** |  |
| conventional DMARD | 1 (33.3) |
| folic acid | 1 (33.3) |
| antihypertensive | 1 (33.3) |
|  |  |
| **Medications used by TKA patients -** **1st evaluation, n (%)** |  |
| corticosteroid | 1 (20.0) |
| ferrous sulphate | 1 (20.0) |
| diuretic | 1 (20.0) |
| gastric protector | 1 (20.0) |
| antihypertensive | 1 (20.0) |
|  |  |
| **Medications used by TAK patients -** **2nd evaluation, n (%)** |  |
| corticosteroid | 1 (16.6) |
| ferrous sulphate | 1 (16.6) |
| diuretic | 1 (16.6) |
| gastric protector | 1 (16.6) |
| immunosuppressive | 1 (16.6) |
| antihypertensive | 1 (16.6) |
|  |  |

n = number

JSLE = Juvenile Systemic Lupus Erythematosus. JIA = Juvenile Idiopathic . Arthritis. JSSc =

Juvenile Systemic Sclerosis. JDM = Juvenile Dermatomyositis. TAK = Takayasu’s Arteritis.

NSAIDs = nonsteroidal anti-inflamatory drugs. DMARDs = disease-modifying antirheumatic

Drugs.
